# Supplementary material for: Detailed Analysis of Apoptosis and Delayed Luminescence of Human Leukemia Jurkat T Cells after Proton Irradiation and Treatments with Oxidant Agents and Flavonoids
Source: Hindawi journal article supplement (doi:10.1155/2012/498914), 2012-01-01
Supplement: f1 [file 498914.f1.pdf]

# Detailed analysis of apoptosis and delayed luminescence of human leukemia Jurkat T-cells after proton-irradiation and treatments with oxidant agents and flavonoids

## Supplementary Material

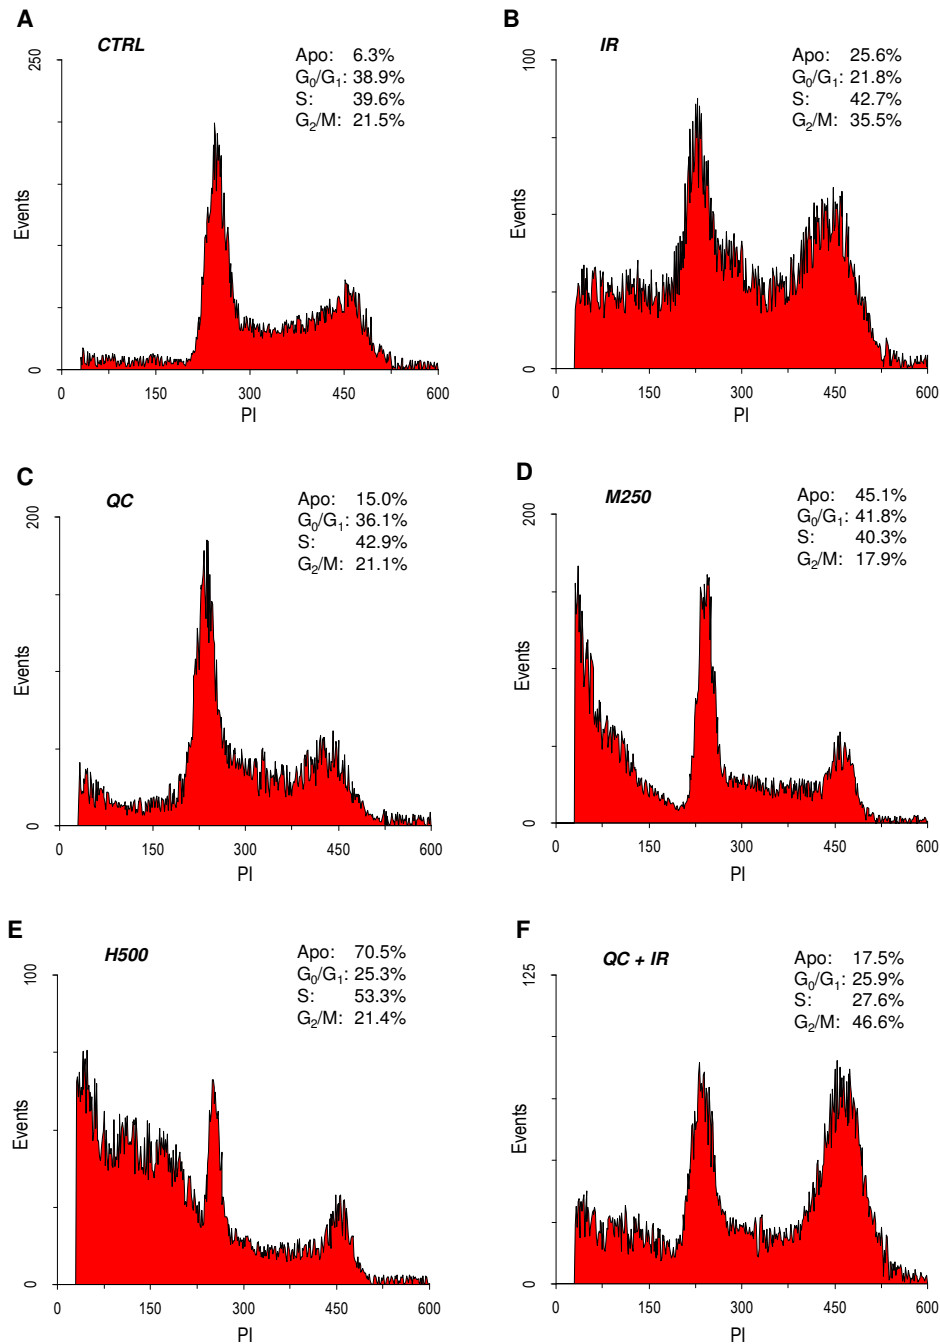

**Fig. S1.** Representative DNA-content histograms obtained by flow cytometry. After the treatment, cells were collected, fixed and stained with propidium iodide as described in Material and Methods. Percentages of sub-G<sub>0</sub>/G<sub>1</sub> (Apo), G<sub>0</sub>/G<sub>1</sub>, S and G<sub>2</sub>/M cells are shown. **(A)** CTRL: Control cells; **(B)** IR: Cells irradiated with 2 Gy of protons; **(C)** QC: Cells treated with 50  $\mu$ M QC for 1 h; **(D)** M250: Cells treated with 250  $\mu$ M MD for 20 min.; **(E)** H500: Cells treated with 500  $\mu$ M H<sub>2</sub>O<sub>2</sub> for 20 min.; **(F)** QC + IR: Cells pre-treated with 50  $\mu$ M QC for 1 h and then irradiated with 2 Gy of protons. Histograms in B-F were recorded 48 h after the treatment.
